# Supplementary material for: Fine-mapping of qTGW2, a quantitative trait locus for grain weight in rice (Oryza sativa L.)
Source: PeerJ. 2020 Mar 4;8:e8679. doi: 10.7717/peerj.8679 (PMC7060756; doi:10.7717/peerj.8679)
Supplement: Supplemental Information 3 [file peerj-08-8679-s005.xls]

## Sheet: HY2
population: HY2
replcation I							replcation II
genotype: 1=Teqing; 2=IRBB52
line	genotype	TGW	GL	GW	LWR		line	geno	TGW	GL	GW	LWR
1	1	25.02	8.0855	2.7805	2.917		1	1	25.739	8.1745	2.807	2.9285
2	2	25.856	8.1425	2.8455	2.87		2	2	25.9415	8.1415	2.82	2.9015
3	2	26.558	8.231	2.829	2.919		3	2	26.4865	8.2035	2.8155	2.93
4	1	24.9255	8.0905	2.761	2.941		4	1	25.448	8.1755	2.7765	2.9585
5	2	26.1055	8.104	2.8315	2.8725		5	2	26.241	8.1925	2.8535	2.885
6	1	24.6145	7.954	2.7515	2.9045		6	1	25.851	8.1665	2.806	2.922
7	1	25.1095	8.1275	2.781	2.9345		7	1	25.5905	8.124	2.7965	2.9235
8	1	24.7665	8.027	2.7725	2.9055		8	1	25.6115	8.101	2.8145	2.894
9	2	26.4925	8.199	2.8615	2.8755		9	2	26.354	8.252	2.835	2.9235
10	1	24.7645	8.012	2.7535	2.9205		10	1	25.543	8.1105	2.778	2.9315
11	2	25.8295	8.2095	2.789	2.9565		11	2	26.4455	8.2385	2.8135	2.9385
12	1	24.6835	7.993	2.767	2.9005		12	1	25.4405	8.094	2.7705	2.934
13	2	26.233	8.2225	2.799	2.949		13	2	26.515	8.2255	2.805	2.947
14	2	25.8055	8.132	2.822	2.894		14	2	25.935	8.1425	2.8095	2.9115
15	1	25.617	8.138	2.817	2.8975		15	1	25.522	8.122	2.7815	2.9325
16	1	25.646	8.141	2.797	2.924		16	1	25.691	8.127	2.7815	2.935
17	1	25.376	8.1005	2.795	2.911		17	1	25.3935	8.077	2.775	2.9255
18	2	26.579	8.2705	2.8305	2.9325		18	2	26.7735	8.2235	2.8215	2.9285
19	2	26.4475	8.236	2.816	2.937		19	2	27.0525	8.263	2.8235	2.938
20	1	25.0865	8.1025	2.7855	2.922		20	1	25.77	8.1165	2.8	2.9115
21	2	26.4535	8.145	2.8625	2.8595		21	2	26.447	8.159	2.86	2.864
22	1	24.967	8.128	2.7625	2.954		22	1	25.1155	8.0905	2.748	2.956
23	2	26.9125	8.256	2.8715	2.8895		23	2	25.85	8.172	2.792	2.9435
24	1	24.871	8.0945	2.76	2.944		24	1	25.243	8.102	2.7825	2.924
25	1	25.3655	8.116	2.7775	2.9325		25	1	25.8755	8.1615	2.809	2.9205
26	2	26.215	8.248	2.814	2.948		26	2	26.016	8.221	2.819	2.927
27	1	25.733	8.1525	2.8215	2.8995		27	1	25.336	8.08	2.7955	2.902
28	2	26.3665	8.1785	2.868	2.865		28	2	26.2385	8.1215	2.8295	2.8825
29	1	25.39	8.0525	2.819	2.866		29	1	25.3405	8.072	2.799	2.8955
30	1	25.454	8.127	2.783	2.935		30	1	24.836	8.036	2.752	2.934
31	2	26.268	8.2175	2.831	2.916		31	2	26.1085	8.151	2.81	2.9155
32	2	26.0615	8.244	2.831	2.924		32	2	25.6985	8.187	2.7715	2.9675
33	2	26.0045	8.1365	2.846	2.8685		33	2	26.0555	8.07	2.8265	2.868
34	1	24.285	8.019	2.7385	2.9415		34	1	25.32	8.048	2.747	2.9435
35	1	24.6	8.0645	2.74	2.9535		35	1	25.426	8.13	2.7935	2.925
36	1	25.5905	8.203	2.8105	2.93		36	1	25.3265	8.1205	2.7845	2.9275
37	2	26.3505	8.203	2.813	2.9285		37	2	26.148	8.174	2.8205	2.9135
38	2	25.4035	8.1195	2.7765	2.9365		38	2	25.0615	8.117	2.7435	2.976
39	2	25.811	8.1825	2.8455	2.885		39	2	25.911	8.2085	2.82	2.923
40	1	24.8875	8.036	2.763	2.9215		40	1	25.037	8.0945	2.776	2.93
41	1	24.7245	7.999	2.7475	2.9265		41	1	25.1225	8.043	2.799	2.8815
42	2	26.1915	8.2895	2.8375	2.931		42	2	25.992	8.193	2.8365	2.899
43	2	25.4015	8.0765	2.7885	2.913		43	2	25.836	8.1305	2.813	2.901
44	1	25.6025	8.137	2.804	2.915		44	1	25.081	8.0415	2.776	2.9095
45	1	25.068	8.0675	2.7985	2.895		45	1	25.1705	8.0395	2.7915	2.8975
46	2	25.2595	8.0415	2.8115	2.8705		46	2	26.112	8.103	2.8365	2.8665
47	2	25.642	8.1895	2.7865	2.9525		47	2	25.975	8.2085	2.8265	2.9145
48	1	24.6465	8.0475	2.79	2.896		48	1	24.727	8.001	2.796	2.8715
49	1	24.9175	7.99	2.781	2.8845		49	1	25.3745	8.0525	2.8105	2.875
50	2	26.2615	8.229	2.8	2.9535		50	2	26.694	8.258	2.8735	2.886
51	2	26.721	8.206	2.8465	2.897		51	2	26.505	8.2465	2.8375	2.92
52	2	25.4305	8.146	2.7285	2.9995		52	2	26.121	8.229	2.7805	2.9715
53	1	24.6835	8.0075	2.7245	2.955		53	1	25.4045	8.0735	2.7805	2.917
54	1	25.671	8.107	2.821	2.8875		54	1	26.0135	8.0935	2.8135	2.8955
55	2	.	.	.	.		55	2	.	.	.	.
56	2	26.154	8.123	2.8295	2.883		56	2	26.274	8.2085	2.8485	2.895
57	1	25.112	7.9535	2.8095	2.841		57	1	25.317	8.0015	2.791	2.8795
58	1	25.4885	8.0485	2.8505	2.8355		58	1	26.1765	8.121	2.824	2.887
59	2	26.249	8.182	2.827	2.9055		59	2	26.893	8.327	2.8075	2.9805
60	1	24.458	7.9545	2.7465	2.9085		60	1	24.664	8.0875	2.7625	2.9365
61	1	24.9385	8.0525	2.769	2.9195		61	1	25.5385	8.12	2.8025	2.91
62	1	25.3635	8.106	2.813	2.8935		62	1	25.2305	8.0985	2.8245	2.8795
63	2	26.0285	8.1935	2.8005	2.9425		63	2	26.49	8.3205	2.8295	2.9505
64	2	26.267	8.182	2.8745	2.857		64	2	25.667	8.1885	2.7985	2.941
65	2	26.1215	8.177	2.852	2.8785		65	2	26.1745	8.15	2.8375	2.8845
66	1	24.863	8.0025	2.752	2.9215		66	1	25.009	8.022	2.7725	2.909
67	1	25.373	8.169	2.783	2.9465		67	1	25.1895	8.129	2.76	2.9605
68	2	26.0445	8.119	2.835	2.878		68	2	26.4715	8.1385	2.8715	2.8485
69	2	26.951	8.264	2.888	2.872		69	2	26.0535	8.1695	2.8545	2.874
70	2	26.6355	8.2365	2.8595	2.894		70	2	26.1905	8.198	2.8495	2.8885

## Sheet: HY3
population: HY3
replcation I							replcation II
genotype: 1=Teqing; 2=IRBB52
line	genotype	TGW	GL	GW	LWR		line	geno	TGW	GL	GW	LWR
1	1	22.627	7.8175	2.656	2.96		1	1	22.4475	7.8705	2.6705	2.9615
2	1	23.1295	7.8785	2.6635	2.971		2	1	23.097	7.9555	2.687	2.9745
3	1	22.935	7.8275	2.648	2.972		3	1	22.6745	7.848	2.6695	2.9525
4	2	24.227	8.05	2.689	3.0065		4	2	23.855	8.0915	2.7045	3.002
5	2	23.6435	8.0225	2.67	3.0185		5	2	23.3375	8.0525	2.6675	3.034
6	1	22.841	7.8795	2.6845	2.953		6	1	22.5525	7.893	2.679	2.9605
7	2	.	.	.	.		7	2	.	.	.	.
8	2	23.778	8.0555	2.669	3.031		8	2	23.4895	8.0245	2.6775	3.0095
9	1	22.1545	7.8685	2.5875	3.059		9	1	22.1185	7.831	2.6305	2.9885
10	2	23.103	7.994	2.6105	3.0815		10	2	24.0775	8.118	2.7	3.0205
11	2	22.968	7.954	2.596	3.0765		11	2	23.924	8.1055	2.6985	3.0155
12	2	22.497	7.976	2.601	3.0825		12	2	23.3185	8.003	2.666	3.0135
13	1	23.008	7.887	2.667	2.9725		13	1	23.4205	7.986	2.7065	2.964
14	2	23.56	8.054	2.666	3.036		14	2	23.9245	8.056	2.7065	2.989
15	1	22.92	7.971	2.6605	3.0095		15	1	23.1495	7.969	2.678	2.991
16	1	22.57	7.915	2.6325	3.0175		16	1	22.687	7.9385	2.675	2.9775
17	2	23.8955	8.051	2.69	3.0065		17	2	23.198	8.0625	2.6705	3.0305
18	2	23.435	8.0165	2.6895	2.9955		18	2	23.896	8.0635	2.6975	3.006
19	2	23.8555	8.091	2.687	3.027		19	2	23.5775	8.007	2.6585	3.0275
20	1	.	.	.	.		20	1	23.0545	7.942	2.671	2.986
21	1	22.839	7.979	2.665	3.007		21	1	22.817	7.9435	2.661	2.9975
22	1	22.7995	7.946	2.6785	2.9795		22	1	22.698	7.9175	2.653	2.9965
23	2	23.753	8.05	2.694	3.001		23	2	23.6235	8.0865	2.673	3.0385
24	1	22.6995	7.9515	2.633	3.0325		24	1	22.671	7.9275	2.6485	3.0055
25	1	22.597	7.908	2.6395	3.01		25	1	22.8855	7.978	2.6825	2.987
26	2	23.9605	8.041	2.705	2.9915		26	2	23.7305	8.064	2.711	2.9865
27	2	23.8865	8.0785	2.697	3.007		27	2	23.611	8.0615	2.7	3.003
28	2	23.514	8.001	2.6645	3.021		28	2	23.984	8.0555	2.692	3.0035
29	1	22.859	7.934	2.683	2.9685		29	1	22.5215	7.9	2.6635	2.9785
30	1	22.6925	8.0225	2.6385	3.053		30	1	22.7205	7.989	2.6405	3.0385
31	2	23.91	8.0995	2.6995	3.011		31	2	23.7745	8.0625	2.693	3.007
32	1	22.5605	7.9225	2.6645	2.9855		32	1	22.461	7.9155	2.6305	3.0235
33	1	22.7115	7.9235	2.647	3.01		33	1	22.542	7.9055	2.6575	2.9865
34	2	23.684	8.08	2.6955	3.011		34	2	23.101	8.028	2.6525	3.04
35	2	23.4715	8.0125	2.6735	3.0105		35	2	23.6195	8.0915	2.6835	3.0275
36	2	23.3625	8.0365	2.673	3.021		36	2	23.406	8.0825	2.6715	3.039
37	1	22.52	7.945	2.6315	3.034		37	1	22.566	7.925	2.6465	3.0105
38	1	22.5335	7.909	2.6505	2.9985		38	1	23.154	7.933	2.7045	2.947
39	2	23.017	7.939	2.6435	3.0195		39	2	23.301	7.9415	2.669	2.991
40	2	23.622	8.0475	2.678	3.019		40	2	23.403	8.028	2.6605	3.031
41	1	22.895	7.917	2.6435	3.0075		41	1	22.815	7.8935	2.674	2.963
42	1	22.645	7.9505	2.62	3.05		42	1	22.8075	7.968	2.6595	3.011
43	1	22.1245	7.864	2.616	3.0265		43	1	22.598	7.987	2.6615	3.012
44	2	23.092	7.9595	2.6425	3.0275		44	2	23.724	8.0755	2.7005	3.0045
45	2	23.709	8.0795	2.703	3.0015		45	2	24.0715	8.113	2.706	3.0105
46	1	22.5255	7.906	2.6395	3.01		46	1	22.6715	7.955	2.6355	3.031
47	1	22.367	7.869	2.6185	3.021		47	1	22.7565	7.94	2.6795	2.974
48	2	22.775	7.9725	2.6475	3.0265		48	2	23.873	8.117	2.701	3.018
49	2	23.383	7.998	2.678	3.001		49	2	23.7475	8.025	2.7065	2.979
50	2	23.28	7.9635	2.6615	3.0065		50	2	23.91	8.084	2.718	2.9875
51	1	22.451	7.914	2.6135	3.043		51	1	22.99	7.994	2.684	2.989
52	1	22.301	7.847	2.627	3.0015		52	1	23.1715	7.988	2.687	2.989
53	2	22.823	7.967	2.638	3.0325		53	2	23.716	8.1315	2.693	3.033
54	2	22.6405	7.908	2.6495	3.0015		54	2	23.469	8.0245	2.685	3.007
55	2	23.7725	8.0475	2.681	3.0145		55	2	23.498	8.012	2.682	3.002
56	1	22.121	7.884	2.6105	3.0325		56	1	22.6235	7.9895	2.656	3.0215
57	1	22.5975	7.9095	2.634	3.018		57	1	22.464	7.927	2.628	3.03
58	2	23.7015	8.0835	2.684	3.025		58	2	23.906	8.053	2.6855	3.013
59	2	23.623	8.0545	2.671	3.029		59	2	23.129	8.0245	2.639	3.0565
60	1	22.498	7.897	2.6455	2.9985		60	1	22.7065	7.9455	2.64	3.024
61	1	22.137	7.8645	2.6185	3.0185		61	1	22.612	7.9315	2.647	3.0085
62	1	22.619	7.8575	2.647	2.9835		62	1	22.942	7.939	2.6715	2.986
63	2	23.5965	8.0025	2.6725	3.0075		63	2	23.7965	8.0755	2.695	3.0135
64	2	23.47	7.931	2.656	3.0055		64	2	22.9745	7.9695	2.6285	3.048
65	1	21.9435	7.8025	2.613	3		65	1	22.1175	7.808	2.64	2.9715
66	1	22.684	7.9285	2.6555	2.9975		66	1	22.3665	7.931	2.6445	3.011
67	2	23.6885	8.0675	2.681	3.0255		67	2	23.659	8.0385	2.7015	2.9915
68	2	23.958	8.098	2.7085	3.0005		68	2	24.0795	8.129	2.715	3.009
69	1	22.5645	7.9705	2.645	3.0275		69	1	23.2595	8.0025	2.695	2.9835
70	1	22.505	7.9135	2.6395	3.0115		70	1	22.4145	7.8895	2.6415	2.999
