# Supplementary material for: Fine-mapping of qTGW2, a quantitative trait locus for grain weight in rice (Oryza sativa L.)
Source: PeerJ. 2020 Mar 4;8:e8679. doi: 10.7717/peerj.8679 (PMC7060756; doi:10.7717/peerj.8679)
Supplement: Supplemental Information 4 [file peerj-08-8679-s006.xls]

## Sheet: Z1
population: Z1
genotype: 1=Teqing; 2=IRBB52; 3=heterozygote；0=missing
plant number	RM14056	RM14189	Tw35293	TGW	GL	GW	LWR
1	2	3	3	23.169	7.8855	2.7715	2.84521
2	2	3	3	23.5145	7.9795	2.776	2.87446
3	2	3	3	23.363	7.8875	2.792	2.82504
4	2	3	3	23.8935	8.014	2.808	2.85399
5	2	1	1	25.3385	8.1545	2.809	2.90299
6	2	3	3	23.556	7.96	2.7905	2.85254
7	2	1	1	23.563	7.989	2.768	2.8862
8	2	1	1	24.3405	8.137	2.7745	2.93278
9	2	1	1	23.1865	7.9325	2.751	2.8835
10	2	3	3	23.695	8.03	2.773	2.89578
11	2	3	3	23.806	7.9965	2.817	2.83866
12	2	2	2	23.8055	7.9465	2.8315	2.80646
13	2	1	1	23.876	8.0175	2.804	2.85931
14	2	2	2	.	.	.	.
15	2	3	3	23.8135	7.9735	2.788	2.85994
16	2	3	3	22.9805	7.8685	2.7425	2.8691
17		2	2	.	.	.	.
18		3	3	24.042	7.9945	2.81	2.84502
19		2	2	24.118	7.99	2.823	2.83032
20		2	2	23.927	7.954	2.8065	2.83414
21		3	3	24.1305	8	2.8215	2.83537
22		2	2	24.076	7.95	2.7905	2.84895
23		3	3	23.715	7.889	2.783	2.83471
24		2	2	23.186	7.857	2.7665	2.84005
25		2	2	.	.	.	.
26		3	3	23.873	7.977	2.7965	2.85249
27		1	1	24.1215	8.037	2.804	2.86626
28		1	1	24.878	8.0825	2.832	2.85399
29		3	3	23.97	7.9605	2.794	2.84914
30		2	2	23.991	8.0115	2.8085	2.85259
31		1	1	24.0875	7.9955	2.7875	2.86834
32		2	2	22.8085	7.8715	2.751	2.86132
33		3	3	24.175	8.107	2.7745	2.92197
34		1	1	24.0515	8.0485	2.8	2.87446
35		2	2	24.9845	8.1385	2.856	2.84961
36		2	2	24.755	8.1075	2.8545	2.84025
37		2	2	24.1665	8.0635	2.8225	2.85686
38		2	2	24.4135	8.0595	2.812	2.86611
39		3	3	24.1545	8.0395	2.819	2.8519
40		3	3	23.576	7.9645	2.771	2.87423
41		1	1	22.8795	7.8565	2.747	2.86003
42		1	1	23.6665	8.028	2.822	2.84479
43		3	3	24.3075	8.009	2.834	2.82604
44		2	2	24.361	8.1245	2.8235	2.87746
45		1	1	24.085	7.988	2.8185	2.83413
46		3	3	24.091	7.991	2.7965	2.8575
47		3	3	23.996	7.9795	2.816	2.83363
48		3	3	23.324	7.8785	2.798	2.81576
49		1	1	23.7795	8.0745	2.801	2.88272
50		1	1	23.7265	7.938	2.806	2.82894
51		3	3	24.524	8.067	2.848	2.83251
52		1	1	24.783	8.0665	2.8415	2.83882
53		3	3	24.262	7.9875	2.847	2.80558
54		3	3	24.2635	8.0255	2.8105	2.85554
55		2	2	24.2165	8.0615	2.807	2.87193
56		1	1	23.753	7.945	2.7845	2.8533
57		2	2	23.3945	7.8765	2.772	2.84145
58		3	3	25.035	8.087	2.8655	2.8222
59		3	3	24.516	8.042	2.829	2.8427
60		3	3	24.699	8.0585	2.8245	2.85307
61		1	1	24.356	8.0835	2.8135	2.87311
62		3	3	23.888	8.0265	2.7825	2.88464
63		2	2	23.366	7.9405	2.762	2.87491
64		2	2	24.0665	8.0305	2.778	2.89075
65		3	3	23.998	7.959	2.8325	2.80989
66		2	2	23.573	7.9555	2.777	2.86478
67		3	3	24.5285	8.0505	2.824	2.85074
68		1	1	24.083	8.0495	2.812	2.86255
69		1	1	24.27	8.04	2.811	2.86019
70		3	3	24.419	8.0175	2.817	2.84611
71		2	2	23.606	7.948	2.782	2.85694
72		3	3	23.375	7.9095	2.77	2.85542
73		1	1	23.7675	8.0185	2.798	2.8658
74		2	2	23.8225	8.033	2.805	2.86381
75		2	2	.	.	.	.
76		3	3	24.3985	8.0575	2.838	2.83915
77		2	2	24.4105	8.026	2.872	2.79457
78		2	2	24.515	8.0555	2.8555	2.82105
79		2	2	24.06	7.9965	2.8445	2.81121
80		3	3	23.543	7.998	2.7615	2.89625
81		3	3	23.2675	7.9895	2.7825	2.87134
82		3	3	23.801	8.077	2.802	2.88258
83		2	2	23.873	7.9695	2.8435	2.80271
84		3	3	24.8245	8.1505	2.8535	2.85632
85		1	1	25.0155	8.1315	2.8875	2.8161
86		2	2	24.381	8.0335	2.8265	2.84221
87		1	1	24.0745	8.032	2.8105	2.85785
88		3	3	23.2545	7.911	2.737	2.89039
89		3	3	23.895	8.033	2.7865	2.88283
90		3	3	23.7475	8.001	2.81	2.84733
91		2	2	24.429	8.0225	2.8545	2.81047
92		1	1	24.22	8.055	2.8435	2.83278
93		3	3	24.2195	8.0585	2.8755	2.80247
94		1	1	24.584	8.0615	2.8265	2.85211
95		2	2	24.46	8.0275	2.8365	2.83007
96		3	3	23.658	7.9895	2.799	2.85441
97		3	3	23.177	7.894	2.772	2.84776
98		3	3	24.2075	7.9815	2.8445	2.80594
99		2	2	24.334	8.066	2.848	2.83216
100		1	1	24.5805	8.114	2.8455	2.85152
101		1	1	25.0875	8.1585	2.8775	2.83527
102		1	1	24.6405	8.0805	2.846	2.83925
103		2	2	24.625	8.0895	2.8665	2.82208
104		2	2	24.083	8.051	2.7885	2.88722
105		2	2	23.9315	8.0025	2.784	2.87446
106		3	3	25.1185	8.1235	2.865	2.83543
107		3	3	25.447	8.126	2.869	2.83235
108		3	3	24.927	8.149	2.8675	2.84185
109		3	3	23.823	7.9805	2.8215	2.82846
110		2	2	24.53	8.081	2.8405	2.84492
111		2	2	24.654	8.103	2.861	2.83223
112		1	1	24.0475	7.959	2.8195	2.82284
113		2	2	23.7145	7.891	2.7955	2.82275
114		2	2	24.691	8.0295	2.839	2.82828
115		3	3	24.8505	8.051	2.8525	2.82244
116		3	3	24.773	8.0965	2.8705	2.82059
117		3	3	24.702	8.1165	2.8445	2.8534
118		2	2	24.335	8.072	2.8375	2.84476
119		3	3	24.3605	8.0935	2.828	2.86192
120		1	1	23.529	7.95	2.787	2.85253
121		3	3	23.264	7.9585	2.782	2.86071
122		1	1	24.0985	8.0195	2.813	2.85087
123		2	2	23.8235	8.013	2.8005	2.86127
124		2	2	24.0945	8.0155	2.8115	2.85097
125		2	2	24.3395	8.042	2.8275	2.84421
126		3	3	24.42	8.0485	2.8415	2.83248
127		3	3	24.6135	8.055	2.854	2.82235
128		1	1	23.8725	8.0455	2.7485	2.92723
129		2	2	23.259	7.9605	2.7585	2.88581
130		2	2	23.7535	8.078	2.794	2.8912
131		1	1	24.138	8.0335	2.8515	2.81729
132		1	1	23.828	7.998	2.7905	2.86615
133		1	1	23.9645	7.974	2.8055	2.84227
134		3	3	23.7045	7.9695	2.8335	2.8126
135		2	2	23.7145	8.0265	2.772	2.89556
136		2	2	23.3385	7.8525	2.747	2.85857
137		3	3	23.222	7.9275	2.7525	2.88011
138		3	3	23.8585	8.03	2.804	2.86377
139		1	1	23.819	8.033	2.788	2.88128
140		2	2	23.848	8.002	2.835	2.82257
141		3	3	24.3425	8.0265	2.8495	2.81681
142		3	3	23.889	8.049	2.807	2.86747
143		3	3	23.7875	7.974	2.767	2.88182
144		3	3	23.1835	7.9275	2.7725	2.85933
145		3	3	23.317	7.92	2.784	2.84483
146		3	3	22.837	7.8905	2.762	2.85681
147		3	3	23.4735	7.988	2.786	2.86719
148		3	3	23.802	8.013	2.81	2.8516
149		3	3	24.123	8.022	2.8435	2.82117
150		1	1	23.9575	8.0025	2.822	2.83575
151		3	3	23.975	7.999	2.802	2.85475
152		2	2	22.9075	7.928	2.7325	2.90137
153		2	2	23.5805	7.965	2.7815	2.86356
154		1	1	23.978	8.022	2.7965	2.86859
155		3	3	24.0445	8.0355	2.838	2.8314
156		3	3	24.009	8.0345	2.796	2.87357
157		3	3	24.1745	8.038	2.842	2.82829
158		2	2	24.6565	8.102	2.834	2.85886
159		3	3	23.884	7.992	2.784	2.87069
160		2	2	22.972	7.9025	2.732	2.89257
161		3	3	23.3485	8.0065	2.7595	2.90143
162		3	3	23.729	7.991	2.803	2.85087
163		3	3	23.122	8.012	2.8005	2.86092
164		3	3	23.7065	7.999	2.7965	2.86036
165		1	1	24.2895	8.025	2.812	2.85384
166		1	1	23.3105	7.8895	2.7605	2.858
167		1	1	23.737	7.992	2.764	2.89146
168		3	3	23.5145	8.0195	2.7605	2.90509
169		1	1	23.3905	7.8995	2.779	2.84257
170		2	2	24.0655	7.979	2.806	2.84355
171		1	1	23.2745	7.8865	2.7845	2.83229
172		2	2	23.3845	7.9045	2.7825	2.84079
173		1	1	23.31	7.8985	2.78	2.84119
174		3	3	23.1285	7.884	2.752	2.86483

## Sheet: Z2
population: Z2
genotype: 1=Teqing; 2=IRBB52; 3=heterozygote；0=missing
plant number	Tw32437	Tw35293	RM266	TGW	GL	GW	LWR
1	2	1	1	23.113	7.989	2.968	2.704
2	2	1	1	23.305	7.948	2.941	2.712
3	2	1	1	24.369	8.145	2.946	2.775
4	2	1	1	24.446	8.058	3	2.694
5	2	1	1	23.83	8.199	2.99	2.75
6	2	1	1	23.885	8.053	2.965	2.727
7	2	1	1	24.696	8.192	2.977	2.764
8	2	3	3	25.377	8.301	2.986	2.789
9	2	3	3	25.146	8.218	2.947	2.798
10	2	3	3	23.938	8.064	2.977	2.718
11	2	2	2	25.467	8.289	3.053	2.725
12	2	1	1	24.912	8.156	3.022	2.706
13	2	2	2	26.138	8.371	3.041	2.762
14	2	1	1	24.703	8.08	3.014	2.687
15	2	1	1	25.14	8.104	2.998	2.711
16	2	1	1	24.807	8.117	2.938	2.773
17	2	2	2	27.061	8.364	3.064	2.737
18	2	1	1	25.233	8.17	2.961	2.771
19	2	1	1	25.924	8.294	3.005	2.768
20	2	1	3	25.177	8.221	3.022	2.729
21	2	2	2	24.762	8.14	2.954	2.764
22	2	1	1	25.611	8.286	2.976	2.793
23	2	3	3	25.519	8.225	2.972	2.778
24	2	3	3	25.9	8.204	3.025	2.721
25	2	1	1	25.456	8.27	2.987	2.777
26	2	1	1	24.961	8.156	2.954	2.769
27	2	2	2	25.783	8.197	3.002	2.74
28	2	2	2	26.132	8.272	3.021	2.747
29	2	3	3	24.771	8.136	2.993	2.729
30	2	2	2	24.862	8.143	3.03	2.695
31		1	1	24.137	8.136	2.963	2.754
32		1	1	25.387	8.314	2.952	2.826
33		3	3	25.93	8.251	3.015	2.746
34		1	1	24.893	8.095	2.978	2.728
35		1	1	25.118	8.143	2.975	2.746
36		1	1	25.171	8.231	2.971	2.779
37		3	3	25.418	8.108	3.028	2.686
38		1	1	24.963	8.137	2.992	2.728
39		2	3	25.093	8.196	2.998	2.743
40		3	3	24.377	8.051	3.003	2.691
41		3	3	24.776	8.095	2.95	2.754
42		1	1	25.328	8.235	2.987	2.767
43		3	3	25.705	8.266	2.99	2.775
44		2	2	26.352	8.304	3.053	2.728
45		3	3	25.66	8.221	2.972	2.775
46		2	2	26.074	8.318	3.028	2.756
47		2	2	26.171	8.337	3.034	2.756
48		1	1	24.561	8.214	2.949	2.796
49		1	1	25.389	8.304	2.997	2.781
50		2	2	24.732	8.151	2.986	2.739
51		1	1	24.42	8.16	2.965	2.761
52		1	1	25.228	8.291	2.949	2.822
53		1	1	25.521	7.933	3.08	2.583
54		1	1	24.948	7.922	3.03	2.625
55		1	1	25.675	8.27	3.042	2.726
56		2	2	25.907	8.298	2.968	2.806
57		1	1	25.725	8.333	3.004	2.785
58		1	1	25.158	8.135	3.001	2.719
59		2	2	25.808	8.3	3	2.776
60		1	1	23.737	8.006	2.973	2.703
61		3	3	24.536	8.267	3.001	2.764
62		1	1	24.901	8.151	3.006	2.72
63		3	3	25.849	8.267	3.045	2.725
64		1	1	24.902	8.201	3.018	2.726
65		1	1	24.916	8.144	3.025	2.701
66		1	1	25.051	8.224	2.978	2.773
67		1	1	24.858	8.159	2.96	2.765
68		3	3	25.9	8.359	2.993	2.802
69		3	3	26.464	8.401	3.003	2.808
70		1	1	23.735	7.972	2.956	2.706
71		1	1	24.322	8.05	2.976	2.714
72		1	1	25.016	8.187	2.976	2.759
73		3	3	25.942	8.35	3.031	2.763
74		1	1	25.712	8.194	3.062	2.686
75		1	1	25.15	8.202	2.976	2.765
76		1	1	25.147	8.172	2.961	2.769
77		1	1	25.242	8.204	2.972	2.77
78		3	3	25.382	8.207	2.978	2.768
79		2	2	25.822	8.253	2.98	2.779
80		2	2	25.601	8.225	3.011	2.741
81		1	1	24.461	8.071	2.989	2.709
82		3	3	25.295	8.161	2.989	2.74
83		1	1	25.119	8.225	2.971	2.777
84		3	3	24.994	8.107	3.009	2.704
85		1	1	25.108	8.255	2.958	2.8
86		2	2	26.164	8.234	3.029	2.727
87		1	1	25.14	8.074	2.992	2.706
88		3	3	25.585	8.191	2.982	2.757
89		3	3	25.469	8.219	3.044	2.708
90		1	1	24.169	8.024	2.956	2.723
91		3	3	24.226	8.028	2.965	2.716
92		1	1	24.31	8.007	2.951	2.723
93		2	2	26.465	8.434	3.025	2.797
94		3	3	25.715	8.226	2.983	2.766
95		1	1	25.056	8.255	2.952	2.805
97		1	1	25.731	8.33	2.967	2.817
98		1	1	25.39	8.241	2.941	2.813
99		1	1	25.644	8.288	2.96	2.81
100		1	1	24.402	8.041	2.966	2.72
101		1	1	24.024	8.02	2.952	2.726
102		3	3	25.337	8.157	2.983	2.742
103		1	1	25.361	8.157	2.996	2.731
104		1	1	25.349	8.324	2.972	2.809
105		1	3	26.003	8.287	2.981	2.788
106		2	2	25.944	8.252	2.971	2.787
107		1	1	25.818	8.311	2.987	2.789
109		1	1	24.786	8.177	2.922	2.807
110		1	1	24.615	8.096	3	2.709
111		1	1	24.113	7.973	2.949	2.714
112		1	1	25.2	8.121	3.002	2.714
113		1	1	25.621	8.251	2.98	2.777
114		3	3	25.828	8.24	2.975	2.779
115		2	2	26.025	8.175	3.028	2.708
117		1	1	24.56	7.943	2.992	2.664
118		1	1	25.142	8.089	2.983	2.72
119		1	1	24.605	8.138	2.963	2.756
120		2	2	25.419	8.146	2.978	2.746
121		1	1	24.301	8.087	2.963	2.738
122		1	1	24.863	8.133	2.975	2.743
123		1	1	25.1	8.133	3.007	2.713
124		3	3	25.026	8.119	2.968	2.744
125		1	1	25.602	8.178	2.998	2.739
126		1	1	25.673	8.19	3.047	2.697
127		3	3	25.505	8.217	3	2.749
128		1	1	24.608	8.08	2.953	2.745
129		1	1	25.736	8.237	3.01	2.745
130		1	1	24.101	8.096	2.984	2.722
131		1	1	24.031	8.079	2.958	2.741
132		2	2	25.6	8.128	2.99	2.728
133		1	1	24.578	8.011	2.963	2.713
134		3	3	25.249	8.148	2.989	2.736
135		2	2	26.206	8.251	3.023	2.739
136		1	1	24.913	8.153	2.974	2.749
137		2	2	26.408	8.396	2.977	2.83
138		1	1	25.293	8.145	2.982	2.74
139		1	1	25.569	8.335	2.978	2.811
140		2	2	25.045	8.123	2.995	2.721
141		1	1	24.003	8.108	2.96	2.749
142		3	3	24.854	8.166	2.956	2.771
143		1	1	25.192	8.194	2.972	2.765
144		1	1	25.116	8.199	2.987	2.757
145		1	1	25.133	8.207	2.966	2.777
146		1	1	24.793	8.061	2.958	2.735
147		2	2	26.272	8.335	3.008	2.78
148		1	1	25.104	8.171	2.96	2.771
149		1	1	24.309	8.067	2.94	2.755
150		1	1	24.306	8.052	2.997	2.694
151		1	1	23.838	7.976	2.946	2.717
152		1	1	25.092	8.122	3	2.715
153		3	3	25.268	8.084	2.984	2.718
154		1	1	24.745	8.163	2.985	2.743
155		3	3	25.522	8.222	2.978	2.772
156		2	2	26.08	8.262	2.95	2.813
157		1	1	25.45	8.125	3.018	2.7
158		1	1	25.189	8.206	2.941	2.801
159		1	1	25.72	8.304	2.992	2.785
160		1	1	25.24	8.195	2.976	2.765
161		3	3	25.145	8.236	2.99	2.762
162		1	1	24.486	8.155	2.929	2.794
163		2	2	25.757	8.147	3.019	2.709
164		3	3	25.08	8.135	2.965	2.754
165		1	1	25.426	8.22	2.968	2.779
166		1	1	25.619	8.315	2.947	2.832
167		1	1	24.963	8.07	2.981	2.716
168		3	3	25.262	8.188	2.976	2.761
169		1	1	25.167	8.237	2.959	2.795
170		1	1	24.685	8.169	2.999	2.733
171		1	1	24.351	8.13	2.999	2.72
172		2	2	25.526	8.228	2.995	2.758
173		2	2	25.703	8.202	3.055	2.691
174		2	2	25.84	8.234	3.017	2.738
175		1	1	25.372	8.168	2.973	2.756
176		3	3	25.567	8.257	2.963	2.796
177		2	2	26.09	8.32	2.983	2.799
178		2	2	26.155	8.352	3.005	2.789
179		1	1	25.671	8.204	3.005	2.739
180		1	1	24.632	8.086	2.986	2.716
181		3	3	25.171	8.255	2.982	2.776
182		1	1	25.595	8.349	2.964	2.827
183		1	1	24.893	8.082	2.988	2.712
184		2	2	26.312	8.296	2.992	2.784
185		3	3	25.539	8.27	2.96	2.805
186		1	1	25.032	8.139	2.956	2.763
187		3	3	25.786	8.272	2.982	2.783
188		1	1	25.205	8.201	2.98	2.761
189		1	1	24.735	8.214	2.926	2.818
190		3	3	24.784	8.08	2.972	2.727
191		3	3	24.882	8.069	2.955	2.74
192		1	1	25.833	8.298	2.978	2.796
193		2	2	25.625	8.174	2.974	2.758
194		1	1	24.983	8.211	2.937	2.804
195		1	1	25.387	8.241	2.957	2.796
196		1	1	25.443	8.275	2.96	2.804
197		3	3	25.542	8.346	2.981	2.809
198		1	1	25.059	8.113	2.958	2.752
199		1	1	25.316	8.223	2.963	2.782
200		3	3	25.165	8.239	3.005	2.751
201		1	1	24.599	8.168	2.966	2.763
202		1	1	25.18	8.134	2.959	2.759
203		3	3	25.657	8.257	2.977	2.783
204		1	1	25.111	8.101	2.982	2.726
205		2	2	26.547	8.328	3.011	2.776
206		1	1	25.716	8.259	2.973	2.786
207		2	2	25.903	8.32	2.978	2.804
208		2	2	26.711	8.498	3.007	2.839
209		1	1	25.876	8.24	2.984	2.773
210		1	1	24.86	8.131	2.986	2.733
211		1	1	24.3	8.028	2.951	2.728
212		1	1	24.875	8.176	2.956	2.774
213		1	1	25.486	8.246	2.95	2.805
214		2	2	25.362	8.17	2.969	2.762
215		1	1	25.334	8.252	2.932	2.827
216		3	3	25.478	8.252	2.98	2.777
217		1	1	25.708	8.208	2.972	2.772
218		3	3	25.38	8.2	2.965	2.775
219		1	1	25.113	8.13	2.953	2.763
220		1	1	24.409	8.049	2.961	2.727
221		3	3	25.186	8.185	2.986	2.752
222		3	3	26.241	8.411	2.99	2.823
223		1	1	25.096	8.111	2.949	2.76
224		1	1	24.91	8.099	2.949	2.755
225		1	1	25.26	8.201	2.957	2.782
226		2	2	26.475	8.382	2.97	2.833
227		1	1	24.856	8.047	2.992	2.697
228		2	2	25.994	8.322	2.97	2.814
229		1	1	25.064	8.133	2.934	2.782
230		3	3	24.978	8.085	2.964	2.739
231		2	2	25.089	8.153	2.989	2.737
232		1	1	24.715	8.158	2.969	2.757
233		1	1	24.888	8.112	3.008	2.704
234		1	1	25.069	8.162	3.017	2.713
235		1	1	25.389	8.237	2.99	2.763
236		3	3	24.778	8.124	2.962	2.753
237		1	1	25.051	8.189	2.97	2.765
238		2	2	26.301	8.338	3.026	2.765
239		1	1	24.747	8.075	2.976	2.723
240		1	1	24.285	8.037	2.986	2.699

## Sheet: Z3
population: Z3
genotype: 1=Teqing; 2=IRBB52; 3=heterozygote; 0=missing
plant number	Tw35293	Tw35395	RM266	TGW	GL	GW	LWR
1	1	1	1	24.689	8.153	3.002	2.727
2	1	1	1	25.354	8.172	3.023	2.713
3	1	3	3	25.339	8.279	3.007	2.762
4	1	3	3	25.107	8.149	2.998	2.727
5	1	1	1	25.664	8.293	3.029	2.748
6	1	3	3	25.121	8.242	3.032	2.726
7	1	3	3	25.182	8.235	3.016	2.741
8	1	3	3	25.541	8.248	3.008	2.752
9	1	1	1	24.732	8.143	3.008	2.717
10	1	3	3	24.596	8.094	2.973	2.732
11	1	1	1	24.274	8.216	3.018	2.73
12	1	3	3	25.889	8.222	3.014	2.738
13	1	2	2	26.605	8.304	3.065	2.718
14	1	3	3	26.407	8.26	3.067	2.703
15	1	2	2	26.545	8.272	3.054	2.716
16	1	1	1	26.054	8.312	2.998	2.782
17	1	1	1	24.642	9.032	2.739	3.316
18	1	2	2	25.8	8.283	3.029	2.742
19	1	2	2	25.36	8.253	3.036	2.726
20	1	1	1	23.801	8.095	3.001	2.707
21	1	1	1	24.076	8.104	2.991	2.72
22	1	3	3	25.817	8.312	3.018	2.761
23	1	3	3	25.402	8.118	3.015	2.702
24	1	3	3	25.825	8.295	2.947	2.824
25	1	1	1	26.362	8.242	3.03	2.731
26	1	3	3	26.054	8.189	3.066	2.678
28	1	3	3	26.341	8.296	3.052	2.726
29	1	1	1	26.304	8.265	3.035	2.731
30	1	3	3	24.936	8.161	3.017	2.715
31		3	3	24.778	8.151	2.991	2.735
32		3	3	25.955	8.271	3.01	2.758
33		1	1	26.395	8.234	3.055	2.705
34		2	2	26.167	8.244	3.034	2.724
35		3	3	26.254	8.31	3.074	2.711
36		1	1	25.984	8.168	3.044	2.693
37		3	3	25.132	8.191	2.981	2.76
38		3	3	26.617	8.29	3.05	2.725
39		2	2	26.678	8.353	3.034	2.762
40		2	2	24.669	8.132	2.975	2.743
41		1	1	24.54	8.083	2.961	2.74
42		2	2	26.189	8.246	3.026	2.736
43		1	1	25.366	8.211	3.028	2.719
44		2	2	26.154	8.217	3.042	2.707
45		1	1	25.505	8.199	2.972	2.768
47		2	2	26.219	8.33	3.036	2.751
48		3	3	25.957	8.277	3.022	2.747
49		3	3	25.327	8.185	2.938	2.797
50		2	2	25.06	8.15	3.012	2.715
51		3	3	24.881	8.164	3.002	2.728
52		3	3	26.316	8.351	3.051	2.744
53		2	2	26.651	8.347	3.068	2.731
54		1	1	26.236	8.245	3.049	2.711
55		3	3	26.411	8.269	3.045	2.724
56		3	3	25.678	8.171	3.024	2.71
57		3	3	27.41	9.152	2.792	3.292
58		3	3	25.996	8.243	3.024	2.734
59		2	2	26.316	8.314	3.021	2.762
60		1	1	25.259	8.2	3.011	2.733
61		1	1	24.597	8.188	3.001	2.738
62		3	3	25.725	8.252	3.026	2.734
63		2	2	25.779	8.325	3.025	2.759
64		2	2	26.358	8.255	3.049	2.714
65		1	1	26.156	8.231	3.049	2.708
66		3	3	26.583	8.344	3.03	2.764
67		2	2	25.985	8.198	3.041	2.705
68		2	2	25.881	8.261	3.051	2.716
69		1	1	26.539	8.246	3.045	2.716
70		2	2	25.369	8.172	3.027	2.711
71		1	1	25.207	8.259	2.999	2.765
72		1	1	26.268	8.327	3.066	2.725
73		2	2	26.769	8.295	3.057	2.721
74		2	2	26.797	8.268	3.07	2.7
75		1	1	25.639	8.223	3.04	2.715
76		3	3	26.385	8.379	2.989	2.815
77		1	1	26.817	8.331	3.081	2.713
78		3	3	26.209	8.261	3.03	2.739
79		3	3	26.173	8.248	3.061	2.704
80		2	2	24.864	7.954	3.068	2.604
81		3	3	25.358	8.183	2.972	2.765
82		3	3	26.371	8.312	3.008	2.772
83		1	1	26.703	8.331	3.029	2.761
84		2	2	26.863	8.253	3.072	2.696
85		1	1	26.796	8.317	3.047	2.74
86		3	3	26.468	8.202	3.062	2.687
87		3	3	26.945	8.3	3.051	2.73
88		2	2	26.53	8.304	3.066	2.716
89		2	2	25.791	8.199	3.003	2.74
90		3	3	25.469	8.209	3.052	2.7
91		3	3	25.365	8.146	3.013	2.712
92		1	1	26.16	8.245	3.058	2.703
93		3	3	26.979	8.291	3.057	2.722
94		3	3	26.679	8.291	3.072	2.707
95		1	1	26.793	8.392	3.052	2.758
96		3	3	26.466	8.243	3.036	2.724
97		1	1	26.56	8.255	3.055	2.71
98		2	2	27.505	8.344	3.083	2.714
99		3	3	26.33	8.231	3.045	2.71
100		3	3	25.98	8.234	3.055	2.704
101		2	2	25.497	8.24	3.025	2.734
102		2	2	25.035	8.233	3.081	2.68
103		1	1	26.139	8.238	3.021	2.737
104		1	1	27.105	8.409	3.086	2.733
105		2	2	27.387	8.348	3.059	2.74
106		3	3	27.196	8.313	3.069	2.716
107		3	3	26.895	8.291	3.075	2.704
108		3	3	27.547	8.342	3.108	2.693
109		3	3	27.074	8.28	3.094	2.683
110		2	2	25.279	8.01	3.09	2.601
111		2	2	25.709	8.236	3.062	2.698
112		1	1	26.166	8.233	3.038	2.718
113		1	1	26.829	8.319	3.084	2.705
114		3	3	27.271	8.367	3.109	2.697
115		3	3	26.585	8.255	3.066	2.701
116		3	3	26.254	8.275	3.034	2.737
117		2	2	27.208	8.303	3.088	2.697
118		3	3	26.45	8.253	3.058	2.708
119		3	3	26.768	8.293	3.069	2.711
120		3	3	25.837	8.191	3.037	2.705
121		2	2	25.859	8.293	3.055	2.72
122		3	3	26.725	8.33	3.07	2.721
123		3	3	27.199	8.316	3.076	2.713
124		1	1	26.73	8.349	3.044	2.752
125		1	1	27.251	8.378	3.08	2.729
126		3	3	27.148	8.326	3.066	2.724
127		2	2	26.669	8.339	3.041	2.75
128		1	1	26.877	8.262	3.064	2.704
129		1	1	27.145	8.338	3.073	2.722
130		1	1	25.322	8.134	3.023	2.698
131		2	2	25.488	8.176	3.037	2.703
132		1	1	26.689	8.29	3.066	2.711
133		1	1	26.123	8.299	3.029	2.748
134		3	3	27.379	8.307	3.096	2.691
135		2	2	26.885	8.312	3.066	2.721
136		1	1	27.054	8.317	3.059	2.73
137		2	2	27.049	8.286	3.073	2.702
138		2	2	26.518	8.264	3.065	2.706
139		3	3	26.44	8.278	3.067	2.707
140		2	2	25.775	8.222	3.041	2.716
141		2	2	25.783	8.253	3.046	2.719
142		2	2	26.871	8.231	3.073	2.686
143		1	1	26.526	8.257	3.071	2.696
144		1	1	27.011	8.321	3.068	2.721
145		3	3	26.821	8.456	3.004	2.825
146		1	1	27.416	8.418	3.072	2.749
147		2	2	26.967	8.397	3.075	2.738
148		3	3	26.563	8.213	3.074	2.681
149		1	1	26.858	8.262	3.078	2.693
150		3	3	25.317	8.204	3.029	2.715
151		3	3	25.745	8.22	3.035	2.718
152		1	1	27.044	8.277	3.074	2.7
153		2	2	27.034	8.263	3.081	2.69
154		3	3	23.954	8.329	3.018	2.768
155		2	2	27.054	8.282	3.079	2.696
156		3	3	27.555	8.314	3.073	2.713
157		3	3	27.9	8.324	3.119	2.679
158		3	3	26.816	8.236	3.051	2.707
159		2	2	26.44	8.261	3.045	2.721
160		1	1	25.788	8.181	3.031	2.708
161		2	2	25.657	8.268	3.035	2.733
162		2	2	27.149	8.257	3.09	2.68
163		1	1	27.071	8.317	3.075	2.712
164		2	2	26.838	8.3	3.074	2.708
165		3	3	26.815	8.242	3.055	2.705
166		2	2	27.176	8.283	3.067	2.708
167		1	1	26.701	8.297	3.078	2.703
168		1	1	27.408	8.312	3.098	2.69
169		1	1	26.512	8.244	3.055	2.708
170		1	1	25.958	8.277	3.049	2.72
171		3	3	25.066	8.228	3.029	2.726
172		1	1	25.998	8.239	3.046	2.712
173		1	1	27.6	8.325	3.112	2.684
174		1	1	26.563	8.246	3.044	2.719
175		3	3	27.224	8.338	3.101	2.695
176		3	3	27.018	8.342	3.058	2.737
177		1	1	27.083	8.341	3.076	2.718
178		1	1	26.212	8.225	3.057	2.699
179		1	1	27.416	8.353	3.093	2.708
180		1	1	25.326	8.259	3.037	2.73
181		3	3	25.677	8.274	3.021	2.747
182		3	3	26.082	8.194	3.039	2.705
183		3	3	27.003	8.317	3.059	2.727
184		1	1	26.859	8.304	3.052	2.73
185		3	3	27.101	8.252	3.06	2.706
186		1	1	27.002	8.254	3.079	2.687
187		1	1	27.107	8.36	3.088	2.715
188		3	3	27.645	8.383	3.099	2.712
189		3	3	26.05	8.269	3.03	2.736
190		2	2	24.979	8.143	2.983	2.74
191		1	1	25.286	8.206	3.032	2.716
192		1	1	26.587	8.287	3.042	2.732
193		2	2	27.528	8.351	3.114	2.69
194		1	1	26.485	8.202	3.028	2.72
195		1	1	26.923	8.32	3.054	2.731
196		1	1	27.123	8.303	3.072	2.711
197		1	1	26.475	8.185	3.069	2.674
198		3	3	26.516	8.233	3.062	2.696
199		2	2	27.195	8.307	3.099	2.688
200		2	2	25.968	8.202	3.049	2.698
201		3	3	25.415	8.146	3.015	2.71
202		1	1	27.05	8.298	3.072	2.708
203		1	1	27.534	8.27	3.095	2.68
204		3	3	26.484	8.294	3.085	2.696
205		1	1	27.529	8.337	3.081	2.717
206		2	2	27.264	8.316	3.068	2.719
207		2	2	26.959	8.257	3.064	2.701
208		3	3	26.655	8.308	3.109	2.679
209		1	1	26.778	8.274	3.076	2.697
210		1	1	25.669	8.222	3.029	2.724
211		3	3	25.113	8.165	3.013	2.721
212		3	3	27.001	8.293	3.082	2.699
213		3	3	27.239	8.292	3.093	2.689
214		1	1	26.443	8.208	3.042	2.707
215		2	2	26.97	8.293	3.053	2.724
216		3	3	26.672	8.29	3.061	2.716
217		3	3	26.855	8.209	3.064	2.686
218		2	2	26.697	8.297	3.053	2.726
219		3	3	26.093	8.234	3.082	2.681
220		3	3	26.066	8.368	3.131	2.679
221		3	3	25.305	8.224	3.109	2.652
222		3	3	25.893	8.205	3.054	2.694
223		1	1	26.564	8.274	3.091	2.686
224		2	2	26.961	8.364	3.052	2.749
225		1	1	26.664	8.245	3.078	2.687
226		3	3	26.395	8.337	3.04	2.75
227		2	2	26.687	8.361	3.101	2.705
228		1	1	25.095	8.293	3.082	2.698
229		1	1	25.705	8.207	3.047	2.702
230		3	3	23.32	8.275	3.108	2.67
